# Supplementary material
Source: publisher figshare collection journal article supplement (https://tandf.figshare.com/ndownloader/files/17826821)
Supplement: Supplementary file 1 [file 17826821]

(listing pending)
